# Supplementary material for: Identification and quantification of (poly)phenol and methylxanthine metabolites in human cerebrospinal fluid: evidence of their ability to cross the BBB
Source: Royal Society of Chemistry journal article supplement (doi:10.1039/d3fo01913f), 2023-01-01

**Identification and quantification of (poly)phenol and  
methylxanthine metabolites in human cerebral spinal fluid:  
evidence of their ability to cross the BBB.**

Melanie Le Sayec<sup>1</sup>, Diogo Carregosa<sup>2</sup>, Khadija Khalifa<sup>3</sup>, Chiara de  
Lucia<sup>4</sup>, Dag Aarsland<sup>4</sup>, Cláudia N Santos<sup>2</sup> and Ana Rodriguez-Mateos<sup>1\*</sup>.

Supplementary Figures

**Supplementary Figure S1.** Flow Chart study

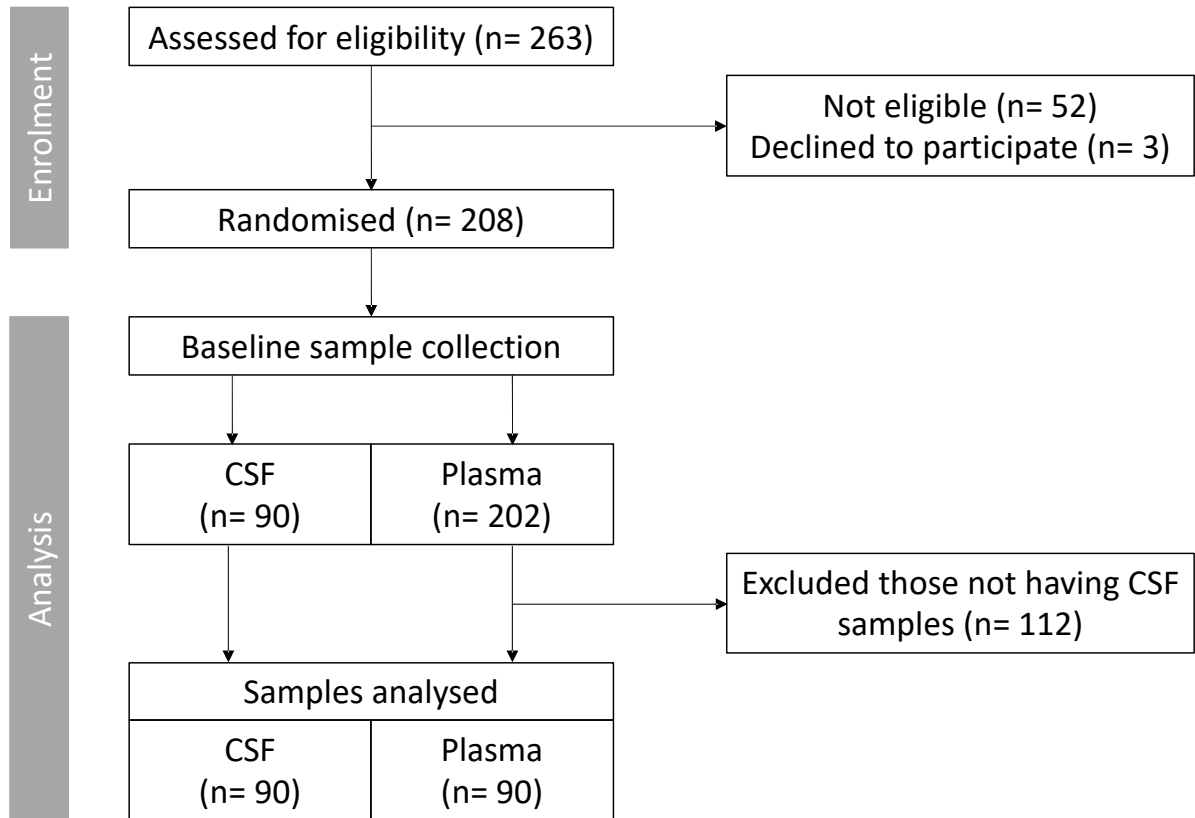

**Supplementary Figure S2.** Correlation between the concentrations of the 20 metabolites quantified in both CSF and plasma. Pearson correlation coefficient = 0.63,  $p = 0.003$ , 95%CI= 0.265-0.840

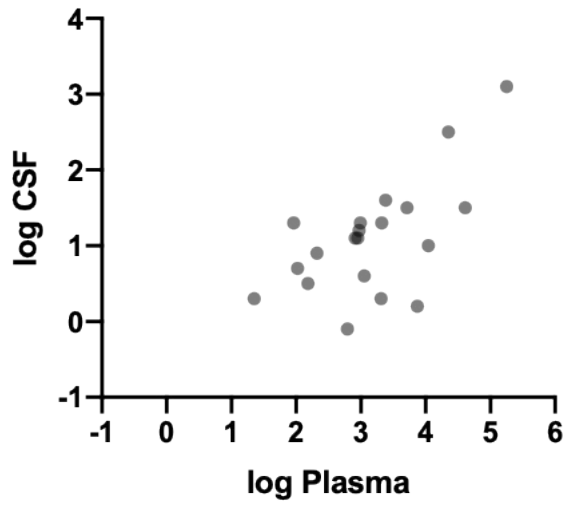

**Supplementary Figure S3.** Plasma and CSF concentrations show high degree of variability amongst volunteers for: (A) 1,3,5-trimethylxanthine, (B) 1,3-dimethylxanthine, (C) 3,7-dimethylxanthine, (D) 3-hydroxybenzoic acid, (E) 3',4'-dihydroxycinnamic acid.

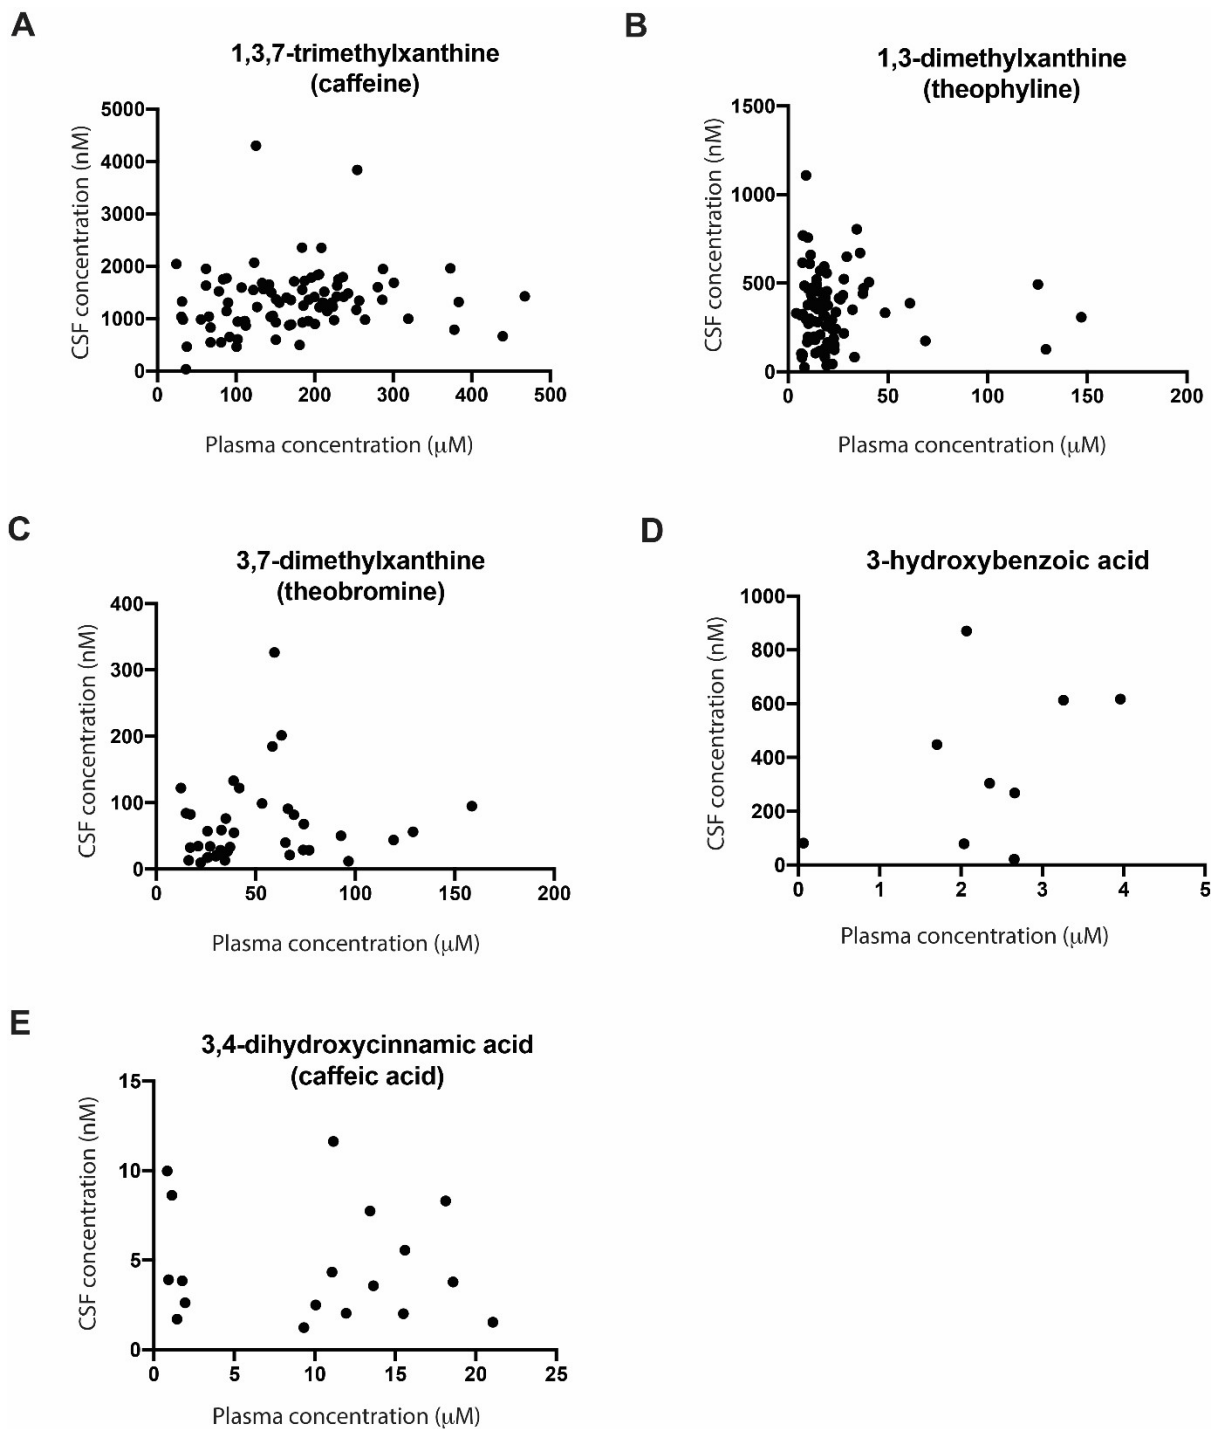

**Supplementary Figure S4.** Plasma and CSF concentrations for the molecules

detected on a small number of volunteers. (A) 3'-methoxycinnamic acid-4'-

glucuronide, (B) 3-(3'-methoxyphenyl)propanoic acid-4'-glucuronide.

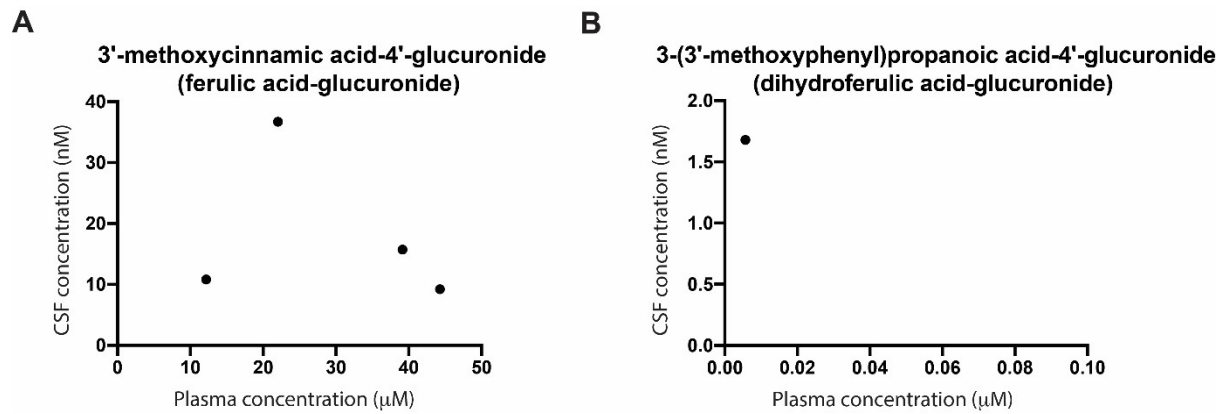

**Supplementary Figure S5.** Plasma and CSF concentrations of the molecules that may show some saturation. These molecules showed a coefficient of variation below 10% for CSF concentrations yet have low plasma concentrations. For these reason further studies might be required to fully confirm saturation of CSF concentrations.

(A) quercetin-glucuronide, (B) 4-O-feruoylquinic acid, (C) 7,8-dihydrocoumarin, (D) (-)-epicatechin.

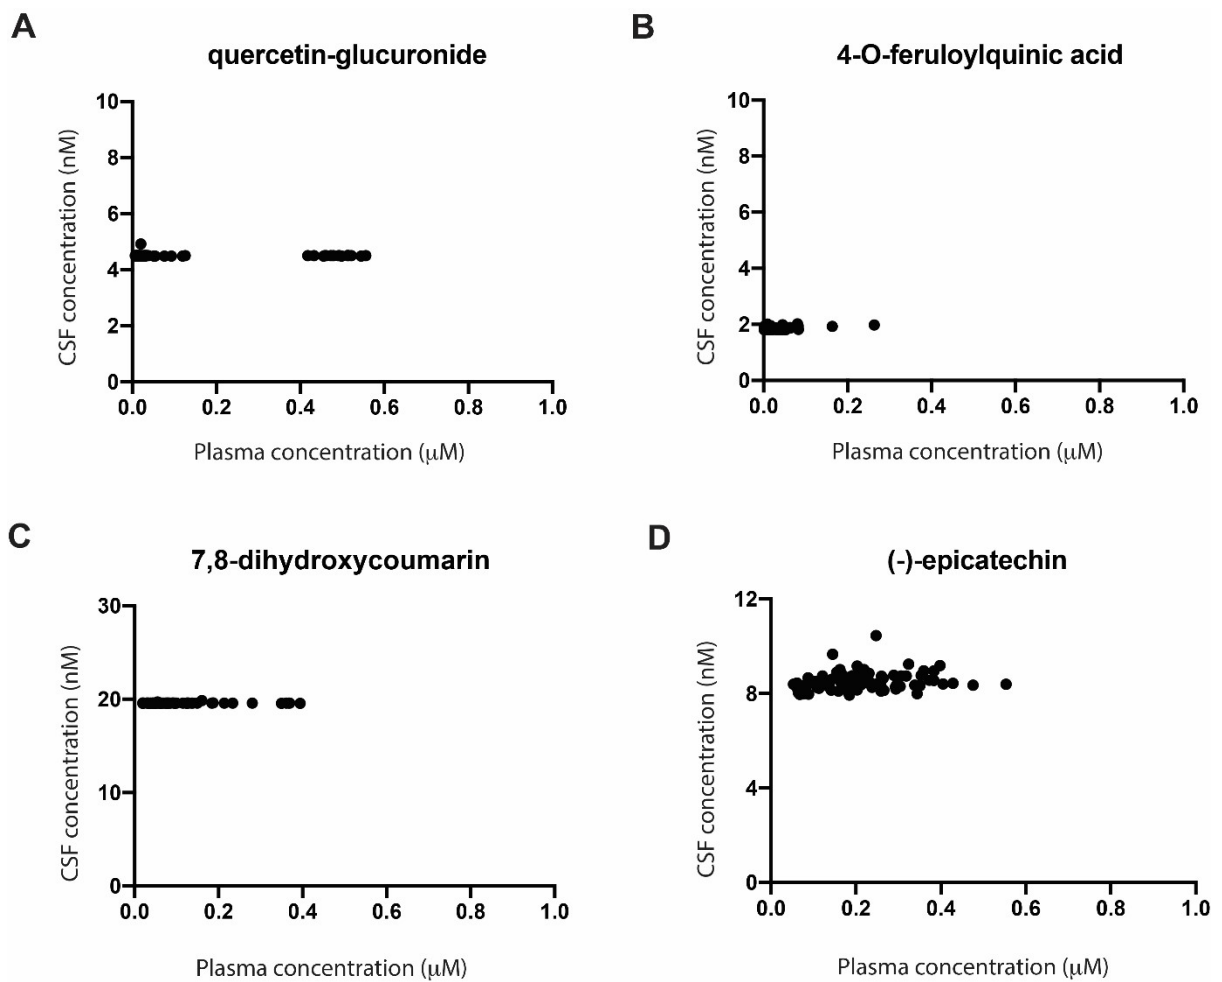

Supplement: d3fo01913f1.pdf [file d3fo01913f1.pdf]
