# Supplementary material for: Identification and quantification of (poly)phenol and methylxanthine metabolites in human cerebrospinal fluid: evidence of their ability to cross the BBB
Source: Royal Society of Chemistry journal article supplement (doi:10.1039/d3fo01913f), 2023-01-01
Supplement: d3fo01913f2.xlsx [file d3fo01913f2.xlsx]

## Sheet: Title
Identification and quantification of (poly)phenol and methylxanthine metabolites in human cerebral spinal fluid: evidence of their ability to cross the BBB.
Melanie Le Sayec1, Diogo Carregosa2, Khadija Khalifa3, Chiara de Lucia4, Dag Aarsland4, Cláudia N Santos2 and Ana Rodriguez-Mateos1*.
Supplementary Tables

## Sheet: Supplementary Table S1
Supplementary Table S1. Results of the targeted analysis of the PP metabolites concentration in CSF and plasma (n= 90).
				CSF (n= 90)					Plasma (n= 90)
Compound name	Other usual name	Abbreviation	LOQ	mean	SD	median	IQR	% quantified (> LOQ)	mean	SD	median	IQR	% quantified (> LOQ)
Benzene diols and triols
1,2-Dihydroxy-4-methylbenzene	4-Methylcatechol	1,2-diOH-4-Me-Benz	8.42833	< LOQ	-	-	-	0	5051.64	2132.84	4615.35	2335.26	100
2-Hydroxy-4-methylbenzene-1-sulfate*	4-Methylcatechol- 1-sulfate	2-OH-4/5-Me-Benz-1-S*	83.5033	< LOQ	-	-	-	0	32658.5	16958.6	29298	22960.4	100
2-Hydroxybenzene-1-glucuronide	Catechol- 1-glucuronide	2-OH-Benz-1-GlcUA	8.45	< LOQ	-	-	-	0	235.834	250.736	149.895	271.937	64.4
2,3-Dihydroxybenzene-1-sulfate	Pyrogallol- 1-O-sulfate	2,3-diOH-Benz-1-S	1.58167	3.83999	0.152558	3.82574	0.20337	100	1132.37	672.223	916.864	674.213	100
2,6-Dihydroxybenzene-1-sulfate	Pyrogallol- 2-O-sulfate	2,6-diOH-Benz-1-S	1.58167	2.15658	0.265692	2.08823	0.132528	100	2041.09	4276.68	317.075	1801.99	100
2-Hydroxy-6-methoxybenzene-1-sulfate*	1-Methylpyrogallol-sulfate	2-OH-3/6-MeO-Benz-1-S*	16.7267	< LOQ	-	-	-	0	5685.77	11628.8	1767.45	6880.74	94.4
3-Hydroxy-2-methoxybenzene-1-sulfate	2-Methylpyrogallol-sulfate	3-OH-2-MeO-Benz-1-S	8.16833	< LOQ	-	-	-	0	2818.18	2822.12	1692.56	3004.86	100
Benzaldehydes
3,4-Dihydroxybenzaldehyde	-	3,4-diOH-BAL	7.75667	< LOQ	-	-	-	0	18.6162	46.5512	9.88078	6.70857	30
4-Hydroxybenzaldehyde	-	4-OH-BAL	7.97333	< LOQ	-	-	-	0	2043.03	1142.19	1655.38	1513.54	100
4-Hydroxy-3-methoxybenzaldehyde	Vanillin	4-OH-3-MeO-BAL	15.7083	< LOQ	-	-	-	0	1567.69	2319	562.651	1120.92	98.9
Benzoic acids
Benzoic acid	-	BA	83.85	< LOQ	-	-	-	0	61518.2	22174	58331	22478.3	98.9
2-Hydroxybenzoic acid	-	2-OH-BA	8.34167	< LOQ	-	-	-	0	5904.16	17095	2303.76	3207.57	96.7
3-Hydroxybenzoic acid	-	3-OH-BA	16.6833	366.794	291.794	304.023	532.085	10	2428.85	2630.19	1742.37	2167.08	97.8
4-Hydroxybenzoic acid	-	4-OH-BA	8.34167	< LOQ	-	-	-	0	1108.21	1363.78	711.539	612.803	100
2,3-Dihydroxybenzoic acid	-	2,3-diOH-BA	83.33	< LOQ	-	-	-	0	< LOQ	-	-	-	0
2,4-Dihydroxybenzoic acid	-	2,4/2,6-diOH-BA*	16.965	< LOQ	-	-	-	0	13588.1	8863.13	10460.7	8824.59	100
2,5-Dihydroxybenzoic acid	-	2,5-diOH-BA	16.705	35.3046	0.0844199	35.2853	0.0915127	100	5082.52	2615.09	4292.3	3932.3	100
2,6-Dihydroxybenzoic acid	-	2,6-diOH-BA	9.25167	< LOQ	-	-	-	0	7578.3	4648.4	5810.38	4343.47	100
3,4-Dihydroxybenzoic acid	Protocatechuic acid	3,4-diOH-BA	8.34167	< LOQ	-	-	-	0	515.063	481.475	386.903	575.852	93.3
3,5-Dihydroxybenzoic acid	-	3,5-diOH-BA	17.03	< LOQ	-	-	-	0	2571.19	3882.45	991.67	1048.75	100
2,3,4-Trihydroxybenzoic acid	-	2,3,4-triOH-BA	8.14667	< LOQ	-	-	-	0	134.415	73.915	113.682	96.3605	100
2-Hydroxy-4-methoxybenzoic acid	-	2-OH-4-MeO-BA	8.32	< LOQ	-	-	-	0	208.99	240.232	132.263	227.54	55.6
3-Hydroxybenzoic acid-4-sulfate	Protocatechuic acid-4-sulfate	3,4-diOH-BA-4-S	8.29833	< LOQ	-	-	-	0	124.596	123.67	104.612	58.0724	10
4-Hydroxybenzoic acid-3-sulfate	Protocatechuic acid-3-sulfate	3,4-diOH-BA-3-S	8.29833	< LOQ	-	-	-	0	77.2233	99.9869	49.8689	71.938	64.4
4-Hydroxybenzoic acid-3-glucuronide	Protocatechuic acid-3-glucuronide	3,4-diOH-BA-3-GlcUA	8.34167	< LOQ	-	-	-	0	< LOQ	-	-	-	0
4-Hydroxy-3,5-dimethoxybenzoic acid	Syringic acid	4-OH-3,5-diMeO-BA	1.66833	< LOQ	-	-	-	0	5211.44	3770.18	4567.18	3864.78	98.9
3,4,5-trihydroxybenzene ethyl ester	Gallic acid ethyl ester	3,4,5-triOH-Benz-OEt	2.05833	ND	-	-	-	-	5.26249	4.14483	4.42459	0.406382	100
3,4,5-Trihydroxybenzoic acid	Gallic acid	3,4,5-triOH-BA	2.21	< LOQ	-	-	-	0	19.0312	14.8768	15.1211	18.2801	68.9
3-Hydroxy-4-methoxybenzoic acid-5-sulfate	4-Methylgallic acid- 3- sulfate	3-OH-4-MeO-BA-5-S	8.19	< LOQ	-	-	-	0	722.619	990.07	222.039	785.578	82.2
4-Hydroxy-3-methoxybenzoic acid	Vanillic acid	4-OH-3-MeO-BA	8.32	< LOQ	-	-	-	0	100.72	92.2985	80.8772	101.839	68.9
3-Methoxybenzoic acid-4-sulfate	Vanillic acid- 4-sulfate	3-MeO-BA-4-S	8.29833	< LOQ	-	-	-	0	462.88	393.012	378.749	305.078	100
4-Methoxybenzoic acid-3-sulfate	Isovanillic acid- 3-sulfate	4-MeO-BA-3-S	8.42833	18.7958	0.438782	18.7583	0.422877	100	2085	740.812	2255.07	884.481	100
Hippuric acids
Hippuric acid	-	HA	166.162	< LOQ	-	-	-	0	387416	243101	344667	243747	100
2ʹ-Hydroxyhippuric acid	Salicyluric acid	2ʹ-OH-HA	1.71167	< LOQ	-	-	-	0	994.618	2531.61	283.464	652.765	98.9
3ʹ-Hydroxyhippuric acid	-	3ʹ-OH-HA	8.71	< LOQ	-	-	-	0	9188.53	8613.73	6490.19	6063.53	100
4ʹ-Hydroxyhippuric acid	-	4ʹ-OH-HA	7.93	< LOQ	-	-	-	0	6737.86	3330.31	6040.71	2631.43	100
α-hydroxyhippuric acid	-	α-OH-HA	41.9033	< LOQ	-	-	-	0	< LOQ	-	-	-	0
Cinnamic acids
Cinnamic acid	-	CA	16.4667	< LOQ	-	-	-	0	5992.15	2916.24	5509.64	2988.62	100
3ʹ,4ʹ-Dihydroxycinnamic acid	Caffeic acid	3ʹ,4ʹ-diOH-CA	1.755	4.71253	3.18564	3.80727	5.04892	20	7394.76	5214.86	8023.88	9174.96	100
3ʹ-Hydroxycinnamic acid-4ʹ-sulfate	Caffeic acid- 4'-sulfate	3ʹ-OH-CA-4ʹ-S	8.32	< LOQ	-	-	-	0	114.005	28.7577	114.005	20.3348	2.2
4ʹ-Hydroxycinnamic acid-3ʹ-sulfate	Caffeic acid- 3ʹ-sulfate	4ʹ-OH-CA-3ʹ-S	8.32	< LOQ	-	-	-	0	415.583	722.097	187.814	319.331	70
3ʹ-Hydroxycinnamic acid-4ʹ-glucuronide	Caffeic acid- 4ʹ-glucuronide	3ʹ-OH-CA-4ʹ-GlcUA	1.64667	< LOQ	-	-	-	0	387.867	202.654	359.777	238.139	100
4ʹ-Hydroxycinnamic acid-3ʹ-glucuronide	Caffeic acid- 3ʹ-glucuronide	4ʹ-OH-CA-3ʹ-GlcUA	1.64667	< LOQ	-	-	-	0	18.6772	16.0439	13.5507	19.8775	51.1
4ʹ-Hydroxy-3ʹ-methoxycinnamic acid	trans-Ferulic acid	4ʹ-OH-3ʹ-MeO-CA	33.3667	< LOQ	-	-	-	0	1381.9	1802.23	715.347	1250.03	71.1
3ʹ-Methoxycinnamic acid-4ʹ-sulfate	Ferulic acid- 4ʹ-sulfate	3ʹ-MeO-CA-4ʹ-S	16.6617	< LOQ	-	-	-	0	1273.62	846.241	1168.75	1017.68	5.6
3ʹ-Methoxycinnamic acid-4ʹ-glucuronide	Ferulic acid- 4ʹ-glucuronide	3ʹ-MeO-CA-4ʹ-GlcUA	17.2033	18.1026	12.7077	13.2499	10.5544	4.4	11110.7	26955	2359.45	3312.06	98.9
3ʹ-Hydroxy-4ʹ-methoxycinnamic acid	Isoferulic acid	3ʹ-OH-4ʹ-MeO-CA	83.33	< LOQ	-	-	-	0	744.085	782.976	505.738	655.772	82.2
4ʹ-Methoxycinnamic acid-3ʹ-sulfate	Isoferulic acid- 3ʹ-sulfate	4ʹ-MeO-CA-3ʹ-S	8.06	12.857	0.0386293	12.8466	0.035271	100	900.32	1093.58	423.944	745.743	100
4ʹ-Methoxycinnamic acid-3ʹ-glucuronide	Isoferulic acid- 3ʹ-glucuronide	4ʹ-MeO-CA-3ʹ-GlcUA	8.55833	< LOQ	-	-	-	0	4056.73	7727.48	697.221	1298.78	96.7
4-O-Caffeoylquinic acid	Cryptochlorogenic acid	4-CQA	1.43	< LOQ	-	-	-	0	177.346	746.225	23.4805	100.24	65.6
5-O-Caffeoylquinic acid	Chlorogenic acid	4/5-CQA*	1.66833	3.18573	0.0609739	3.16965	0.0342432	100	150.657	626.839	18.851	42.0341	100
3-O-Feruloylquinic acid	-	3-FQA	1.71167	< LOQ	-	-	-	0	59.0329	247.755	14.3683	28.9388	100
4-O-Feruloylquinic acid	-	4-FQA	1.64667	1.84914	0.0535632	1.81668	0.0602873	100	22.2305	35.9242	10.2118	20.3099	100
4'-Hydroxy-3',5'-dimethoxycinnamic acid	Sinapic acid	4ʹ-OH-3ʹ,5ʹ-diMeO-CA	1.66833	ND	-	-	-	-	254.575	208.186	188.229	273.564	92.2
3ʹ-Hydroxycinnamic acid	m-Coumaric acid	3ʹ-OH-CA	1.45167	< LOQ	-	-	-	0	1831.87	1107.05	1565.42	1451.28	100
4ʹ-Hydroxycinnamic acid	p-Coumaric acid	4ʹ-OH-CA	1.66833	< LOQ	-	-	-	0	114.031	108.442	84.461	113.136	72.2
2ʹ-Hydroxycinnamic acid	o-Coumaric acid	2ʹ-OH-CA	1.21333	< LOQ	-	-	-	0	168.236	153.84	110.279	178.405	98.9
Cinnamic acid-4ʹ-sulfate	p-Coumaric acid- 4ʹ-sulfate	CA-4ʹ-S	8.49333	< LOQ	-	-	-	0	142.902	135.696	77.1151	202.974	8.9
Cinnamic acid-4ʹ-glucuronide	p-Coumaric acid- 4ʹ-glucuronide	CA-4ʹ-GlcUA	8.34167	< LOQ	-	-	-	0	2205.26	5124.49	96.2845	238.259	73.3
Phenylacetic acids
Phenylacetic acid	-	PA	166.118	< LOQ	-	-	-	0	38070.1	72990.9	11237.2	13267.1	98.9
3ʹ-Hydroxyphenylacetic acid	-	3ʹ-OH-PA	16.6833	< LOQ	-	-	-	0	16815.7	13711.3	12133.1	9677.72	100
3ʹ,4ʹ-Dihidroxyphenylacetic acid	Homoprotocatechuic acid	3ʹ,4ʹ-diOH-PA	16.6183	< LOQ	-	-	-	0	1438.74	623.512	1371.15	917.435	100
3ʹ-Methyoxyphenylacetic acid-4ʹ-sulfate	Homovanillic acid-sulfate	3ʹ-MeO-PA-4ʹ-S	1.625	< LOQ	-	-	-	0	420.869	235.088	377.485	217.827	100
Phenylpropanoic acids
2-(4ʹ-Hydroxyphenoxy)propanoic acid	-	2-(4ʹ-OH-ph-O)-PrA	16.6183	< LOQ	-	-	-	0	347.11	174.449	341.728	242.392	83.3
3-(2ʹ-Hydroxyphenyl)propanoic acid	-	3-(2ʹ-OH-ph)-PrA	8.01667	< LOQ	-	-	-	0	2720.15	4507.57	701.393	2013.37	63.3
3-(3ʹ-Hydroxyphenyl)propanoic acid	-	3-(3ʹ-OH-ph)-PrA	8.49333	< LOQ	-	-	-	0	1767.89	1493.8	1208.78	2812.46	68.9
3-(2ʹ,3ʹ-Dihydroxyphenyl)propanoic acid	-	3-(2ʹ,3ʹ-diOH-ph)-PrA	7.475	15.8721	0.366363	15.808	0.533079	100	943.154	382.337	944.624	437.996	100
3-(2ʹ,4ʹ-Dihydroxyphenyl)propanoic acid	-	3-(2ʹ,4ʹ-diOH-ph)-PrA	9.38167	< LOQ	-	-	-	0	1520.76	824.581	1275.22	921.714	100
3-(3ʹ,4ʹ-Dihydroxyphenyl)propanoic acid	Dihydrocaffeic acid	3-(3ʹ,4ʹ-diOH-ph)-PrA	8.32	< LOQ	-	-	-	0	265.521	208.855	232.168	269.277	94.4
3-(3ʹ,5ʹ-Dihydroxyphenyl)propanoic acid	-	3-(3ʹ,5ʹ-diOH-ph)-PrA	9.70667	< LOQ	-	-	-	0	1097.04	785.925	899.435	679.188	100
2-Hydroxy-3-(4ʹ-hydroxyphenyl)propanoic acid	-	3-(4ʹ-OH-ph)-2-OH-PrA	9.425	< LOQ	-	-	-	0	10248.1	3072.03	9271.77	4075.76	100
3-(4ʹ-Hydroxyphenyl)propanoic acid-3ʹ-glucuronide	Dihydrocaffeic acid- 3ʹ-glucuronide	3-(4ʹ-OH-ph)-PrA-3ʹ-GlcUA	16.7483	< LOQ	-	-	-	0	615.524	659.487	225.964	1238.1	55.6
3-(4ʹ-Hydroxyphenyl)propanoic acid-3ʹ-sulfate	Dihydrocaffeic acid- 3ʹ-sulfate	3-(4ʹ-OH-ph)-PrA-3ʹ-S	8.42833	< LOQ	-	-	-	0	1704.18	1044.19	1376.5	1133.22	100
3-(3ʹ-Methoxyphenyl)propanoic acid-4ʹ-sulfate	Dihydroferulic acid- 4ʹ-sulfate	3-(3ʹ-MeO-ph)-PrA-4ʹ-S	1.755	< LOQ	-	-	-	0	408.88	481.423	257.199	317.674	97.8
3-(3ʹ-Methoxyphenyl)propanoic acid-4ʹ-glucuronide	Dihydroferulic acid-4ʹ-glucuronide	3-(3ʹ-MeO-ph)-PrA-4ʹ-GlcUA	1.56	1.67552	-	1.67552	0	1.1	618.652	813.627	296.962	459.466	100
3-(4ʹ-Methoxyphenyl)propanoic acid-3ʹ-sulfate	Dihydroisoferulic acid-3ʹ-sulfate	3-(4ʹ-MeO-ph)-PrA-3ʹ-S	1.625	< LOQ	-	-	-	0	380.691	321.039	272.842	573.844	100
3-(4ʹ-Methoxyphenyl)propanoic acid-3ʹ-glucuronide	Dihydroisoferulic acid-3ʹ-glucuronide	3-(4ʹ-MeO-ph)-PrA-3ʹ-GlcUA	1.56	< LOQ	-	-	-	0	575.939	745.314	304.395	533.462	100
Flavan-3-ols
(‒)-Epicatechin	-	EC	8.34167	8.51248	0.382967	8.45251	0.443352	100	207.291	106.174	189.85	143.878	100
(‒)-Epicatechin-3'-sulfate	-	EC-3'-S	8.125	12.0829	0.457526	11.8574	0.258795	100	819.398	960.119	628.579	689.732	100
Flavonols
Quercetin	-	Quercetin	1.64667	< LOQ	-	-	-	0	344.366	178.815	312.058	216.553	100
Quercetin-3'-sulfate	-	Quercetin-3-S	8.36333	18.1107	0.01	18.1064	0	100	969.763	2014.22	91.9047	76.2126	100
Quercetin-3'-glucuronide	-	Quercetin-3-GlcUA	1.73333	4.50276	0.0447028	4.49714	0.01	100	104.946	181.228	17.2903	24.8785	100
Quercetin-7'-glucuronide	-	Quercetin-7-GlcUA	8.36333	< LOQ	-	-	-	0	706.95	556.189	542.122	275.739	100
Kaempferol	-	Kaempferol	1.755	< LOQ	-	-	-	0	102262	32606.3	97614.4	35549.8	100
Kaempferol-3-glucuronide	-	Kaempferol-3-GlcUA	1.79833	< LOQ	-	-	-	0	1244.68	1761.39	1016.49	153.8	100
Myricetin	-	Myricetin	8.29833	< LOQ	-	-	-	0	841.105	703.589	575.51	695.339	97.8
Morin	-	Morin	8.53667	< LOQ	-	-	-	0	92.732	67.8624	71.3168	99.3029	73.3
Valerolactones
(4R)-5-(3′-hydroxyphenyl)-γ-valerolactone-4′-sulfate	-	5-(3′-OH-ph)-γ-VL-4′-S	8.32	< LOQ	-	-	-	0	1401.08	1487.26	1081.93	1495.11	47.8
Flavanones
Naringenin-4'-glucuronide	-	Naringenin-4'-GlcUA	8.16833	< LOQ	-	-	-	0	704.713	282.318	655.625	362.875	100
Naringenin-7'-glucuronide	-	Naringenin-7-GlcUA	8.16833	< LOQ	-	-	-	0	709.97	462.336	617.418	324.543	100
Hesperetin-3'-glucuronide	-	Hesperetin-3'-GlcUA	8.36333	< LOQ	-	-	-	0	766.023	572.266	599.336	238.478	100
Hesperetin-7'-sulfate	-	Hesperetin-7-S	8.255	< LOQ	-	-	-	0	7678.34	6288.74	6327.56	3952.19	97.8
Hesperetin	-	Hesperetin	8.34167	< LOQ	-	-	-	0	186.654	102.689	167.703	111.197	100
Flavones
Flavone	-	Flavone	8.255	< LOQ	-	-	-	0	1647.17	1045.53	1290.78	2155.27	100
Dihydrochalcones
Phloretin	-	Phloretin	16.6183	< LOQ	-	-	-	0	5781.27	1140.71	6036.42	845.208	100
Isoflavonoids
Equol	-	Equol	8.16833	< LOQ	-	-	-	0	1729.78	1769.68	1286.03	916.045	100
Equol-glucuronide	-	Equol-7-GlcUA	8.32	< LOQ	-	-	-	0	793.711	365.495	716.102	339.752	100
Equol-sulfate	-	Equol-4ʹ-S	8.32	< LOQ	-	-	-	0	859.291	309.8	825.07	397.104	100
Daidzein	-	Daidzein	7.865	< LOQ	-	-	-	0	< LOQ	-	-	-	0
Lignans
Secoisolariciresinol	-	SECO	8.27667	< LOQ	-	-	-	0	2809.55	3260.74	1809.75	1199.83	95.6
Enterodiol	-	Enterodiol	8.27667	< LOQ	-	-	-	0	830.108	375.228	826.203	476.259	100
Enterolactone-glucuronide	-	Enterolactone-GlcUA	8.255	< LOQ	-	-	-	0	2492.51	2100.78	1824.02	2569.57	100
Enterolactone-sulfate	-	Enterolactone-S	8.34167	< LOQ	-	-	-	0	501.384	895.731	148.077	300.915	28.9
Enterolactone	-	Enterolactone	8.255	< LOQ	-	-	-	0	607.56	619.49	389.402	414.629	97.8
Hydroxycoumarins
7,8-Dihydroxycoumarin	-	7,8-diOH-CM	8.42833	19.5867	0.0322707	19.5816	0.00807099	-100	90.9914	82.5519	60.8651	49.3878	100
3,8-Dihydroxy-urolithin	Urolithin A	3,8-diOH-Uro	8.40667	< LOQ	-	-	-	0	79.1344	59.2309	57.6604	88.5118	10
3-Hydroxy-urolithin	Urolithin B	3-OH-Uro	8.645	< LOQ	-	-	-	0	379.984	408.129	292.744	260.221	100
3,9-Dihydroxy-urolithin	Isourolithin A	3,9-diOHUro	8.34167	< LOQ	-	-	-	0	1109.43	610.605	1001.41	721.738	94.4
Ellagic acid	-	Ellagic acid	8.385	ND	-	-	-	-	137.883	-	137.883	0	1.1
Tyrosols
2-(4-hydroxyphenyl)ethanol	Tyrosol	ph-etOH	7.30167	< LOQ	-	-	-	0	2227.4	5370.42	880.807	1623.58	76.7
Phenylethanol-4ʹ-sulfate	Tyrosol sulfate	ph-etOH-4ʹ-S	8.03833	< LOQ	-	-	-	0	201.816	227.063	127.086	207.112	46.7
3ʹ,4ʹ-Dihydroxyphenylethanol	Hydroxytyrosol	3ʹ,4ʹ-diOH-ph-etOH	8.16833	< LOQ	-	-	-	0	29.018	31.8877	17.7038	26.2175	63.3
3ʹ-Hydroxyphenylethanol-4ʹ-sulfate	Hydroxytyrosol-4'-sulfate	3ʹ-OH-ph-etOH-4ʹ-S	8.32	< LOQ	-	-	-	0	31.9137	37.8146	16.1425	35.2619	3.3
4ʹ-Hydroxyphenylethanol-3ʹ-sulfate	Hydroxytyrosol-3'-sulfate	4ʹ-OH-ph-etOH-3ʹ-S	8.45	< LOQ	-	-	-	0	282.02	217.206	258.23	212.673	15.6
Stilbenes
Dihydroresveratrol	-	diOH-Res	8.40667	< LOQ	-	-	-	0	1185.59	827.496	1141.65	914.991	23.3
trans-Resveratrol-4ʹ-glucuronide	-	t-Res-4'-GlcUA	8.29833	< LOQ	-	-	-	0	448.286	879.387	87.109	192.402	95.6
trans-Resveratrol-3-glucuronide	-	t-Res-3-GlcUA	8.29833	< LOQ	-	-	-	0	2598.93	3644.68	781.246	2742.46	100
cis-Resveratrol-4ʹ-glucuronide	-	c-Res-4'/3-GlcUA*	8.32	< LOQ	-	-	-	0	502.41	301.15	435.962	207.977	100
cis-Resveratrol-3-glucuronide	-	c-Res-3-GlcUA	16.7267	< LOQ	-	-	-	0	477.746	308.723	425.883	353.196	100
trans-Resveratrol-3-Sulfate	-	t-Res-3-S	8.385	< LOQ	-	-	-	0	2064.25	2993.33	997.315	1685.29	100
Methylxanthine alkaloids
1-Methylxanthine	-	1-MeX	16.5533	< LOQ	-	-	-	0	13660.9	7458.23	11702.7	8957.18	100
3-Methylxanthine	-	3-MeX	8.32	< LOQ	-	-	-	0	5306.51	3823.73	4308.02	3582.01	100
7-Methylxanthine	-	7-MeX	33.41	< LOQ	-	-	-	0	6488.45	4892.23	4707.36	5786.48	100
1,3-Dimethylxanthine	Theophylline	1,3-DiMeX	17.03	65.2334	62.9774	43.8683	57.4528	43.3	40430.3	27380.2	32475.7	29455.5	100
1,7-Dimethylxanthine	Paraxanthine	1,7-DiMeX	7.43167	< LOQ	-	-	-	0	14347.8	8118.88	15214.1	12025.4	100
3,7-Dimethylxanthine	Theobromine	3,7-DiMeX	8.29833	347.853	197.43	332.72	262.309	96.7	22446.2	23654	17082.5	11759.9	100
1,3,7-Trimethylxanthine	Caffeine	1,3,7-TriMeX	17.42	1347.59	611.867	1312.93	661.027	97.8	178824	118442	172052	120854	100
Units in nM. IQR, Interquartile range; LOQ, Limit of quantification; SD, Standard deviation.

## Sheet: Supplementary Table S2
Supplementary Table S2. List of molecular descriptors and recommended range by QikProp.
Molecular Descriptor	Description	Rangea
# amine	Number of amine groups	0 - 1
# amidine	Number of amidine and/or guanidine groups	0
# acid	Number of carboxylic acid groups	0 - 1
# amide	Number of amide groups	0 - 1
# rotor	Number of rotatable bonds (non-hindered)	0 - 15
# rtvFg	Number of reactive functional groups	0 - 2
Dipole	Dipole moment	1.0 - 12.5
SASA	Solvent-accessible surface area (angstroms squared)	300 - 1000
FOSA	Hydrophobic component of SASA	0 - 750
FISA	Hydrophilic component of SASA	7 - 330
PISA	component of SASA	0 - 450
WPSA	Weakly polar component of SASA	0 - 175
Volume	Total volume accessible by solvent (angstorms cube)	500 - 2000
Donor HB	Number donor hydrogen bonds	0 - 6
AccptHB	Number acceptor hydrogen bonds	0 - 2
Dip^2/V	Dipole moment squared divided by the molecular volume	0 - 0.13
ACxDN^0.5/SA	Index of cohesive interaction in solids	0.00 - 0.05
Glob	Globularity (4pir^2)/SASA	0.75 - 0.95
QPpolrz	Predicted polarizability in cubic angstroms	13 - 70
QPlogPC16	Predicted hexadecane/gas partition coefficient	4 - 18
QPlogPoct	Predicted octanol/gas partition coefficient	8 - 35
QPlogPw	Predicted water/gas partition coefficient	4 - 45
QPlogPo/w	Predicted octanol/water partition coefficient	-2 - 6.5
QPlogS	Prediction aqueous solubility	-6.5 - 0.5
QPlogHERG	Predicted IC50 of HERG K+ channels	Concern below -5
QPlogKp	Predicted skin permeability	-8 - (-1)
IP(ev)	PM3 calculated ionization potential	7.9 - 10.5
EA(eV)	PM3 calculated electron affinity	-0.9 - 1.7
QPlogKhsa	Prediction of binding to serum albumin	-1.5 - 1.5
#metab	Predicted number of metabolic reactions	1 - 8
HumanOralAbsorption	Predicted human oral absorption (qualitative: 1, 2 or 3)	-
PercentHuman	Predicted human oral absorption	<20% is poor
OralAbsorption		>80% is high
SAFluorine	Solved-accessible surface area of fluorine atoms	0 - 100
SAamideO	Solvent-accessible surface area of amide oxygen atoms	0 - 35
PSA	Van der Waals surface area of polar nitrogen and oxygen atoms and carbonyl atoms	7 - 200
#NandO	Number of nitrogen and oxygen atoms	2 - 15
RuleOfFive	Number of violations of Lipinski’s rule of five	Maximum is 4
RuleOfThree	Number of violations of Jorgensen’s rule of three	Maximum is 3
CNS	Predicted central nervous system activity (Qualitative from inactive -2 to +2 active)	-
QPPCaco	Predicted Caco-2 cell permeability (nm/s)	<25 poor
		>500 great
QPPMDCK	Predicted MDCK cell permeability (nm/s)	<25 poor
		>500 great
QPlogBB	Predicted brain-blood partition coefficient	-3 - 1.2
#stars	Number of properties that fall outside the 95% range of similar values for known drugs. The following properties are included: MW, dipole, IP, EA, SASA, FOSA, FISA, PISA, WPSA, PSA, volume, #rotor, donorHB, accptHB, glob, QPpolrz, QPlogPC16, QPlogPoct, QPlogPw, QPlogPo/w, logS, QPLogKhsa, QPlogBB, #metabol	0 - 5
